# Supplementary material for: Influence of the Porosity of the TiO2 Film on the Performance of the Perovskite Solar Cell
Source: Hindawi journal article supplement (doi:10.1155/2017/4935265), 2017-01-01
Supplement: f1 [file 4935265.f1.pdf]

## Electronic supplementary information

### Influence of the porosity of the TiO<sub>2</sub> film on the performance of the perovskite solar cell

Xiaodan Sun,<sup>a</sup> Jia Xu,<sup>b</sup> Li Xiao,<sup>a</sup> Jing Chen,<sup>a,b</sup> Bing Zhang,<sup>a,c</sup> Jianxi Yao<sup>a,b,\*</sup> and  
Songyuan Dai<sup>a,c,\*</sup>

<sup>a</sup> *State Key Laboratory of Alternate Electrical Power System with Renewable  
Energy Sources, North China Electric Power University, Beijing 102206, China.*

<sup>b</sup> *Beijing Key Laboratory of Energy Safety and Clean Utilization, North China  
Electric Power University, Beijing 102206, China.*

<sup>c</sup> *Beijing Key Laboratory of Novel Film Solar Cell, North China Electric Power  
University, Beijing 102206, China.*

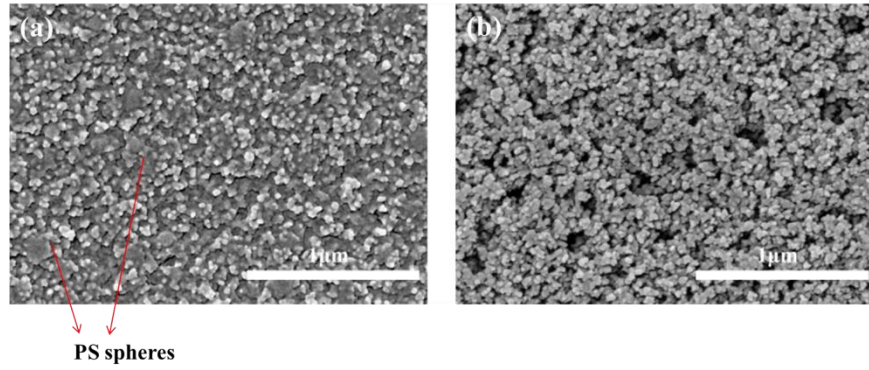

Figure S1 SEM images of sample PS-1.0 (a) before heat treatment (b) after heat treatment

Table S1 Statistic numbers of size of pores in TiO<sub>2</sub> film

| Mass fraction(%) | Total | Max./nm | Min./nm | Mean/nm |
|------------------|-------|---------|---------|---------|
| 0                | 30    | 45.71   | 14.04   | 26.45   |
| 0.5              | 30    | 116.21  | 31.88   | 70.09   |
| 1.0              | 30    | 99.22   | 59.97   | 80.01   |
| 1.5              | 30    | 145.76  | 49.93   | 93.90   |

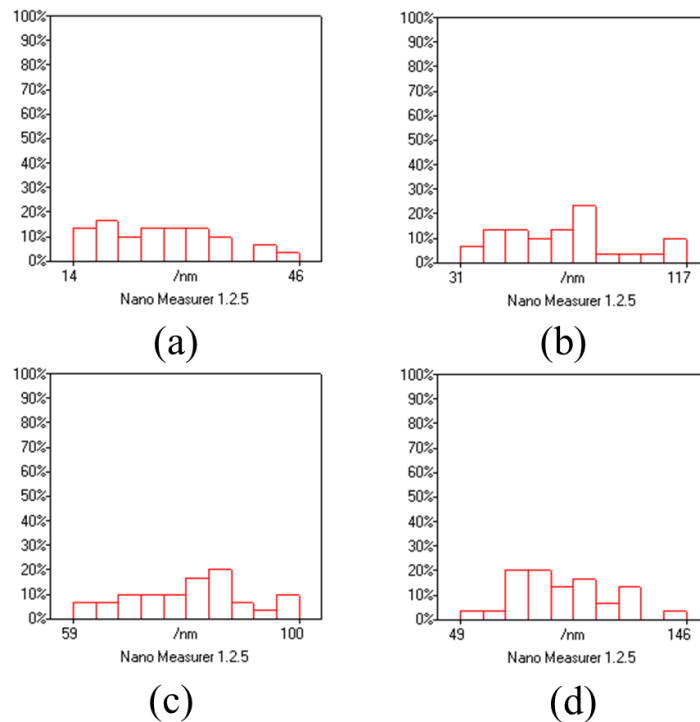

Figure S2 The histogram of pore size distribution in TiO<sub>2</sub> film prepared by doping (a) 0 wt% (b) 0.5 wt% (c) 1.0 wt% (d) 1.5 wt% PS spheres in TiO<sub>2</sub> paste

Table S2 Deviation values of  $J_{sc}$ ,  $V_{oc}$ , FF, and PCE of different sample

|          | PS-0 | PS-0.5 | PS-1.0 | PS-1.5 |
|----------|------|--------|--------|--------|
| $J_{sc}$ | 0.36 | 0.35   | 0.26   | 0.13   |
| $V_{oc}$ | 0.04 | 0.02   | 0.02   | 0.01   |
| FF       | 2.21 | 1.84   | 2.01   | 1.89   |
| PCE      | 0.43 | 0.44   | 0.40   | 0.35   |
